# Supplementary material
Source: Springer Nature journal article supplement (https://www.springermedizin.de/resource/supplementary/13011_2008_84_MOESM2_ESM.pdf/9628360)

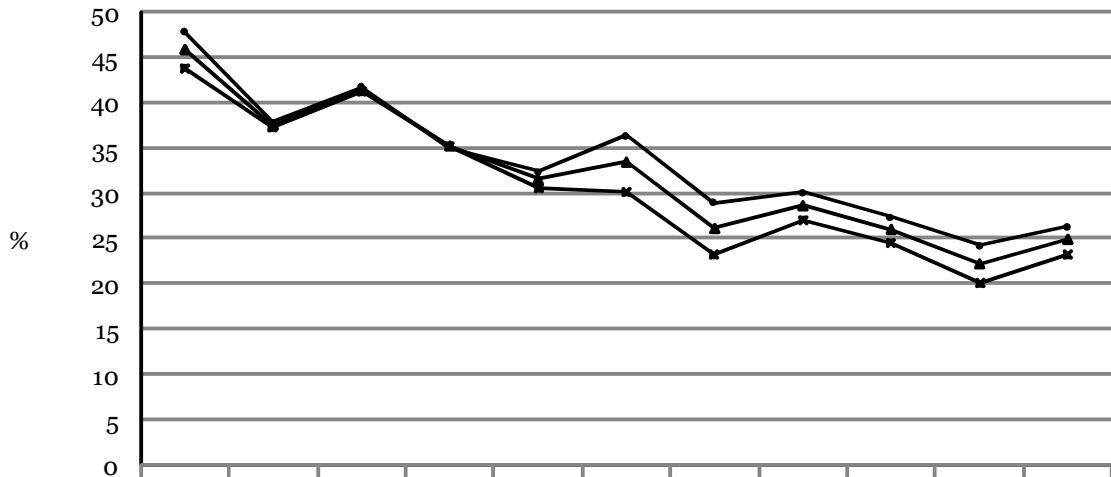

|         |      |      |      |      |      |      |      |      |      |      |      |
|---------|------|------|------|------|------|------|------|------|------|------|------|
| ▲ Total | 45,8 | 37,5 | 41,5 | 35,2 | 31,5 | 33,4 | 26,1 | 28,6 | 26,0 | 22,2 | 24,9 |
| ■ Boys  | 43,8 | 37,2 | 41,2 | 35,3 | 30,5 | 30,1 | 23,2 | 27,1 | 24,6 | 20,1 | 23,3 |
| ● Girls | 47,8 | 37,9 | 41,7 | 35,1 | 32,4 | 36,4 | 29,0 | 30,1 | 27,5 | 24,3 | 26,4 |

Supplement: MOESM2 [file 9628360]
